# Supplementary material for: T-705-Derived Prodrugs Show High Antiviral Efficacies against a Broad Range of Influenza A Viruses with Synergistic Effects When Combined with Oseltamivir
Source: MDPI journal article supplement (doi:10.3390/pharmaceutics15061732), 2023-06-14
Supplement: s1 [file s1]

**(a)** H1N1 + **1a**

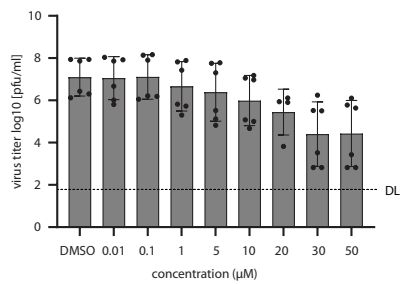

**(b)** H5N1 + **1a**

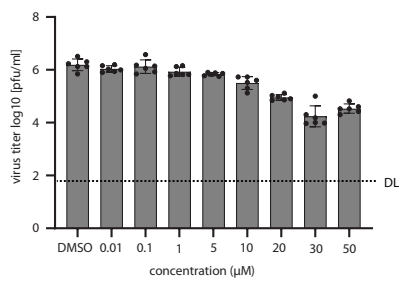

**(c)** H7N9 + **1a**

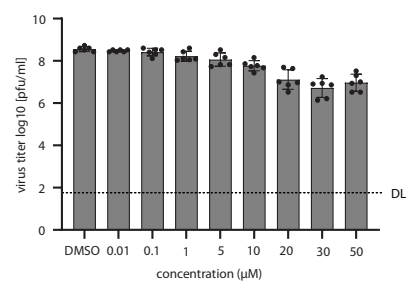

**(d)** H1N1 + **3a**

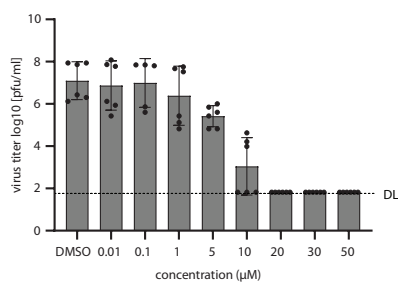

**(e)** H5N1 + **3a**

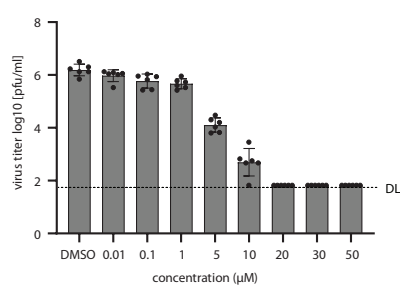

**(f)** H7N9 + **3a**

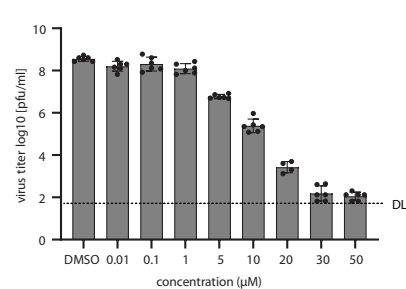

**(g)** H1N1 + **3b**

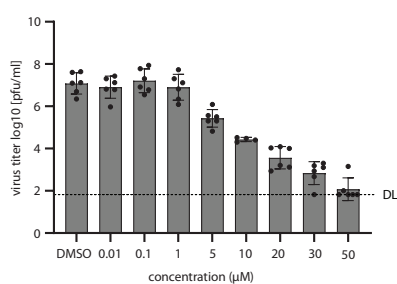

**(h)** H5N1 + **3b**

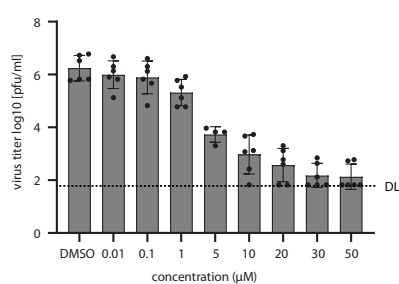

**(i)** H7N9 + **3b**

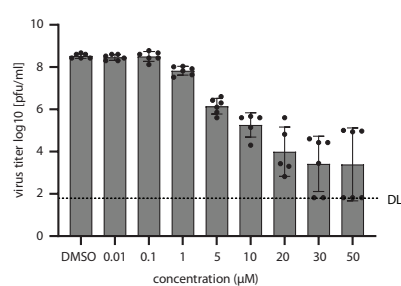

**(j)** H1N1 + **4a**

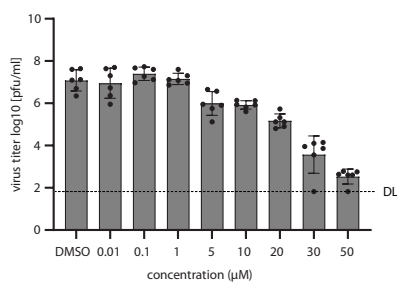

**(k)** H5N1 + **4a**

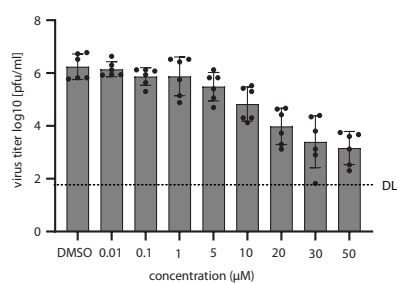

**(l)** H7N9 + **4a**

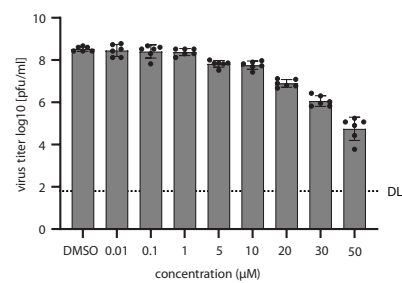

**Figure S1. Antiviral activity of T-705 (1a) and the T-1106 prodrugs (3a, 3b and 4a) against seasonal and avian influenza A viruses. Related to Figures 2 and 3.**

(a-l) MDCKII cells were infected with H1N1 (a,d,g,j), H5N1 (b,e,h,k) or H7N9 (c,f,i,l) IAV at a multiplicity of infection of 0.01 and subsequently treated with T-705 1a (a,b,c) or its prodrug derivatives 3a (d,e,f), 3b (g,h,i) and 4a (j,k,l) at eight different concentrations (range: 0.001 – 50  $\mu$ M). Cell culture supernatants were collected at 24 h post infection and infectious virus titers were determined by plaque assay. DMSO treatment was used as negative control (no inhibition). Shown are the virus titers as log<sub>10</sub> plaque-forming units per ml (pfu/ml)  $\pm$  SD of two independent biological replicates, each performed with technical triplicates.

# Figure S2

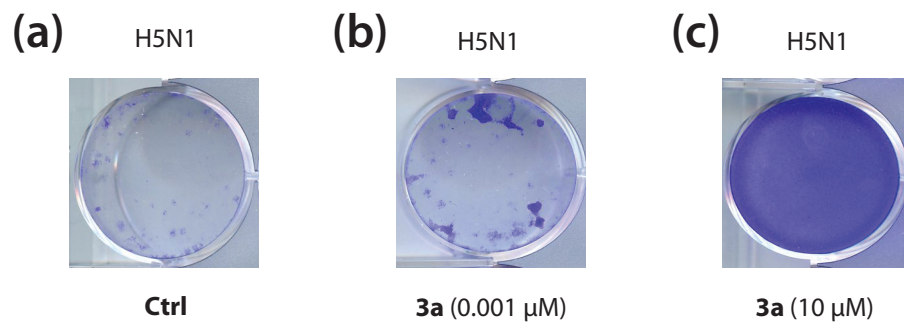

**Figure S2. H5N1 plaques on MDCK cells. *Related to Figure 3.***

(a-c) MDCK cells were infected with H5N1 HPAIV (MOI 0.01) and either control-treated (a) or treated with DP prodrug **3a** at two different concentrations (b, low-dose 0.001  $\mu$ M; c, high-dose 10  $\mu$ M). Cell culture supernatants were collected at 24 h post infection and titrated by plaque assay using serial dilutions for all conditions. The serial dilution data have been used as a basis to calculate viral titers based on plaque numbers. Shown are representative images at  $10^3$  dilution.

(a)

(b)

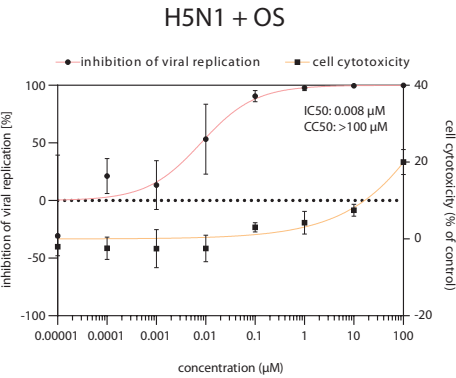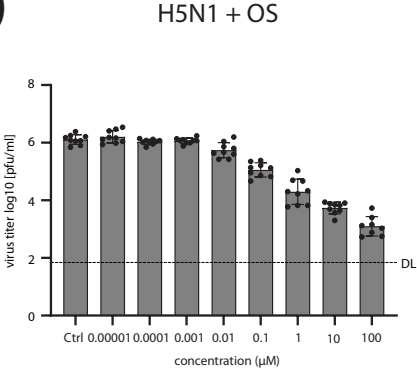

(c)

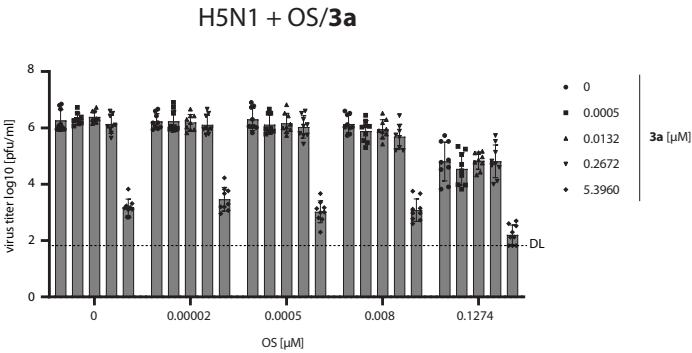

**Figure S3. Antiviral activity of T-1106-derived prodrug 3a in combination with the neuraminidase inhibitor oseltamivir (OS) against H5N1 HPAIV replication. Related to Figure 4.**

(a, left y axis) MDCKII cells were infected with H5N1 at a multiplicity of infection of 0.01 and subsequently treated with the neuraminidase inhibitor oseltamivir (OS) at eight different concentrations (range: 0.00001 – 100  $\mu$ M). Cell culture supernatants were collected at 24 h post infection and infectious virus titers were determined by plaque assay. Mock treatment was used as a negative control. Shown is the average inhibition of viral replication (%)  $\pm$  SD by the respective compound, compared to the Mock control treatment (0% inhibition). Non-linear regression (red curve) was performed to determine the inhibitory concentration 50 (IC<sub>50</sub>) value, which is indicated in the upper right corner of the graph (a, right y axis) MDCKII cells were treated with neuraminidase inhibitor oseltamivir (OS) at eight different concentrations (range: 0.00001 – 100  $\mu$ M). At 24 h post treatment, cell viability was measured using a MTT-based assay according to manufacturer's instructions. Mock treatment was used as negative control. Shown is the average reduction in cell viability (i.e. cell cytotoxicity, in %)  $\pm$  SD, compared to the DMSO control treatment which was arbitrarily set to 0% cell cytotoxicity. Non-linear regression (orange curve) was performed to determine the cell cytotoxicity 50 (CC<sub>50</sub>) value, which is indicated in the upper right corner of the graph. (b) H5N1 HPAIV virus titers as log<sub>10</sub> plaque-forming units (pfu/ml)  $\pm$  SD in MDCKII cells treated with the neuraminidase inhibitor oseltamivir (OS; range 0.00001-100 $\mu$ M) at 24 h post infection (*related to Figure S2a*). Mock treatment was used as negative control (Ctrl) (0% inhibition). The detection limit (DL) is indicated with a dashed line. (a,b) Data are derived from three independent biological replicates, each performed in technical triplicates. (c) MDCKII cells were infected with H5N1 HPAIV at a multiplicity of infection of 0.01 and subsequently treated with combinations of the T-1106-derived prodrug 3a and the neuraminidase inhibitor oseltamivir. The tested concentrations are based on the respective IC<sub>1</sub>, IC<sub>10</sub>, IC<sub>50</sub> and IC<sub>90</sub> values for each drug. Cell culture supernatants were collected at 24 h post infection and infectious virus titers were determined by plaque assay. DMSO treatment was used as negative control (0% inhibition). Shown are the virus titers as log<sub>10</sub> plaque-forming units per ml (pfu/ml)  $\pm$  SD of three independent biological replicates, each performed with technical triplicates.
